## COMMENTARY

# Silencing of genes by promoter hypermethylation: key event in rodent and human lung cancer

Steven A. Belinsky<sup>1</sup>

Lung Cancer Program, Lovelace Respiratory Research Institute,  
2425 Ridgecrest Drive SE, Albuquerque, NM 87108, USA

<sup>1</sup>Email: sbelinsk@LRRRI.org

**Transcriptional silencing by CpG island hypermethylation has become a critical component in the initiation and progression of lung cancer. The ability of pharmacologic agents to reverse promoter hypermethylation also makes it an attractive target to pursue for prevention of lung cancer. Animal models, together with studies in humans have fostered significant advances in elucidating the role of gene-specific methylation in cancer initiation and progression, the modulation of promoter methylation by carcinogen exposure and the ability to block tumor development by preventing epigenetically mediated gene silencing. These advances represent the beginning of efforts to develop a progression model for lung cancer that should aid efforts for early detection and gene targeting for therapy, and the development of preventive interventions that reverse epigenetic-mediated gene silencing.**

### Introduction

The past two decades of research have seen a tremendous growth in defining gene targets and pathways disrupted during the development of lung cancer. Some of the earliest findings identified activation of the *K-ras* oncogene and inactivation of the *p53* tumor suppressor gene by point mutation as predominant alterations in lung cancer etiology (1,2). In spite of identifying dysfunction within these two important genes/pathways, many lung tumors were found to arise independently of alteration within these genes. It became apparent through genome studies of loss of heterozygosity that many DNA regions exist that could contain candidate tumor suppressor genes. One region on the short arm of chromosome 9p was found to contain the *CDKN2A* (*p16*) gene (3,4). Mutations within the *p16* coding sequence were commonly found in melanoma; however, low rates of mutation in other solid tumors such as lung suggested an alternative mechanism for the loss of function (4). *p16* was the first tumor suppressor gene found inactivated in lung cancer predominantly through aberrant hypermethylation of its 5' promoter region (5). The *p16* gene is inactivated by methylation at prevalences up to 60–70% in adenocarcinomas and squamous cell carcinoma (SCC) of the lung, respectively (5–9). The targeting of *p16* for inactivation is likely due to the critical function of this gene

**Abbreviations:** *CDKN2A*, *p16*; DAP-K, death associated protein kinase; MGMT, O<sup>6</sup>-methylguanine-DNA methyltransferase; RAR- $\beta$ , retinoic acid receptor  $\beta$ ; ER, estrogen receptor  $\alpha$ ; SCC, squamous cell carcinoma; NNK, 4-methylnitrosamino-1-(3-pyridyl)-1-butanone; DNMT, cytosine DNA-methyltransferase; DAC, 5-aza-2'-deoxycytidine.

in the cell, to inhibit cyclin dependent kinases that bind cyclin D1 and phosphorylate the retinoblastoma gene (10,11).

Since the identification of aberrant promoter methylation as an inactivating mechanism for the *p16* gene, epigenetically mediated silencing of transcription has been associated with inactivation of >30 genes in lung cancer (12,13). Transcriptional silencing by CpG island hypermethylation affects genes involved in all aspects of cellular function such as cell-cycle control, differentiation and signalling, apoptosis and invasion (13–15). The commonality of gene promoter methylation in the etiology of lung cancer has led our group to investigate the role methylation plays in cancer initiation and whether exposure to defined carcinogens are associated with specific gene inactivations via methylation. The ability of pharmacologic agents to reverse promoter hypermethylation also makes it an attractive target to pursue for prevention of lung cancer (16). The following sections discuss the current findings on these research issues and how animal models have aided these studies.

### Methylation as an initiating event in lung cancer

The fact that many genes controlling cell regulation are inactivated in lung cancer by promoter methylation suggests that a subset of these genes would likely be involved in initiation and others in progression. A progression model similar to that developed for colon cancer is lacking for lung cancer, due to the difficulty in obtaining premalignant lesions from high-risk people without synchronous invasive tumors. To overcome this obstacle we have studied precursor lesions to adenocarcinoma and SCC in an animal model of lung carcinogenesis and in human subjects, respectively. Our initial studies were focused on the *p16* gene (8). In the rat, 94% of adenocarcinomas induced by the tobacco-specific carcinogen 4-methylnitrosamino-1-(3-pyridyl)-1-butanone (NNK) were hypermethylated at the *p16* promoter. This methylation change was also detected frequently in precursor lesions to the tumors—adenomas and hyperplastic lesions. The timing for inactivation of *p16* by methylation in SCC was recapitulated in human SCCs where the *p16* gene was coordinately methylated in 75% of carcinoma *in situ* lesions adjacent to SCCs containing this change (8; Table I). Moreover, in premalignant lesions obtained from persons without SCC, the frequency of this event increased during disease progression from basal cell hyperplasia (17%) to squamous cell metaplasia (24%) to carcinoma *in situ* (50%). Further studies substantiating that inactivation of *p16* may be a very early event in lung cancer examined bronchial epithelial cells obtained through bronchoscopy from cancer-free smokers (17). Methylation of *p16* was detected in 25 of 137 biopsies (18%) that were classified histologically as normal, metaplastic or mildly dysplastic (Table I). In contrast, no methylation of *p16* was seen in biopsies obtained from individuals who had never smoked.

**Table I.** Frequency of *p16* methylation in bronchial epithelial cells, premalignant lesions and SCCs

| Subjects      | Sample type              | Methylation frequency (%) |
|---------------|--------------------------|---------------------------|
| Never smokers | BECs <sup>a</sup>        | 0/17 (0)                  |
| Smokers       | BECs                     | 25/137 (18)               |
|               | Hyperplasia              | 2/12 (17)                 |
|               | Metaplasia               | 4/17 (24)                 |
|               | Carcinoma <i>in situ</i> | 3/6 (50) <sup>b</sup>     |
| Lung cancer   | Carcinoma <i>in situ</i> | 6/12 (50)                 |
|               | SCC                      | 11/18 (61)                |

<sup>a</sup>BEC, bronchial epithelial cells.<sup>b</sup>*P* < 0.05 for linear trend.

We also addressed whether in lung cancer cases an association existed between the methylation status of *p16* in the bronchial epithelium and the diagnosed tumor. Matched tumor tissue and bronchial epithelium (2–3 bronchial biopsies per case) obtained from lung lobes that did not contain the primary tumor were available from 18 cases of non-small cell lung cancer (17). An absolute concordance of being either methylated in the tumor and at least one bronchial epithelium site or unmethylated in the tumor and the bronchial epithelium was seen in 17 of 18 cases. The strong association seen between *p16* methylation in the bronchial epithelium and corresponding primary tumor substantiates the fact that inactivation of this gene, although not transforming by itself, is likely permissive for the acquisition of additional genetic and epigenetic changes leading to lung cancer.

While *p16* is clearly one of the earliest genes known to be altered through methylation in lung cancer, other genes are emerging that are likely inactivated during premalignancy. Methylation of the death associated protein kinase (*DAP-K*) and retinoic acid receptor  $\beta$  (*RAR-\beta*) genes were detected in approximately half of alveolar hyperplasias induced in mouse lungs exposed chronically to NNK (18,19). Supporting the likelihood that *DAP-K* inactivation occurs at the time when premalignant changes can be observed histologically, only 3% of bronchial biopsies examined for *p16* had methylation of *DAP-K* (17). The DNA repair gene, O<sup>6</sup>-methylguanine-DNA methyltransferase (*MGMT*), also appears to be inactivated after the *p16* gene. Only 3 of 40 (8%) biopsies with histologies including normal, hyperplasia, metaplasia and dysplasia obtained from heavy smokers showed methylation of this gene (20). In addition, the prevalence for methylation of *MGMT* increased between stage I adenocarcinoma and stages II–IV (20). The timing for inactivation of the genes studied to date appears to coincide with their roles in cellular homeostasis. Disruption of cell-cycle control (*p16*) would need to be one of the earliest events to allow for clonal expansion. Resistance to apoptosis (*DAP-K*) and loss of normal cell differentiation control (*RAR-\beta*) would further aid in the development of autonomous premalignant clones. The subsequent loss of DNA repair of alkyl adducts (*MGMT*) could lead to acquisition of somatic mutations in genes such as *p53* whose inactivation occurs at more advanced stages of premalignancy (e.g. dysplasia, carcinoma *in situ*) (21,22). These studies represent only the beginning of efforts to develop a progression model for SCC and adenocarcinoma that should aid efforts for early detection and gene targeting for lung cancer therapy (13,23,24).

There have been numerous studies examining the function of genes inactivated by promoter hypermethylation with respect to impacting malignant transformation. Highlights of the studies for three genes, *p16*, *DAP-K* and *RAR-\beta*, will be provided. As mentioned above, *p16* plays an important role in cell cycle control by regulating the phosphorylation of the retinoblastoma gene (10,11). A role for *p16* in immortalization has been suggested since its loss of function allows cells to escape the immortality checkpoint 'M0' (25). Mouse xenografts or nude mouse studies for mesothelioma cells and head and neck cancer cells, respectively, also showed that reexpression of *p16* inhibits tumor formation and diminishes tumor size (26,27). The *DAP-K* gene is important for  $\gamma$ -interferon, tumor necrosis- $\alpha$  and Fas-induced apoptosis (28,29). Expression of *DAP-K* has also been shown to suppress oncogenic transformation of primary embryonic fibroblasts by activating *p53* in a *p19<sup>ARF</sup>*-dependent manner (30). Thus, *DAP-K* could play an important role in eliminating premalignant cells during cancer development. Finally, the *RAR-\beta* gene is a member of the retinoid family that mediates cell differentiation and proliferation. The antitumor effects of *RAR-\beta* are mediated, in part, through inhibition of cell proliferation and metastasis as well as apoptosis (31,32). Thus, the important functions of these genes and others inactivated through promoter hypermethylation supports a causal role for their involvement in the initiation and progression of lung carcinogenesis.

### Environmental exposures target genes for promoter hypermethylation

It is well established that specific DNA adducts are associated with specific somatic mutations in oncogenes and tumor suppressor genes. The best example is the *K-ras* gene where mutation profiles in codons 12 and 61 have been strongly correlated with the promutagenic adducts generated from the metabolism of carcinogens such as NNK, benzo[*a*]pyrene and urethane (33,34). In addition, hot spots for mutation in the *p53* gene have also been linked to preferential binding of the diol epoxide adduct generated through activation of benzo[*a*]pyrene (35). In contrast, there have been no direct studies to determine the role of DNA damage in initiating gene-specific promoter hypermethylation. Our initial approach to this issue was to ask whether carcinogen exposures that damage DNA through different mechanisms such as single-strand versus double-strand breaks would induce lung tumors that arise via inactivation of either different genes or inactivate genes at a higher prevalence. We first examined the methylation of the estrogen receptor  $\alpha$  (*ER*) CpG island in lung tumors from humans, rats and mice (36). *ER* methylation was seen at a similar low prevalence (~20%) in lung tumors induced in humans by cigarette smoke or in rats and mice by NNK. Tumors in unexposed mice or never smokers showed a much higher prevalence for methylation of the *ER* gene (Figure 1). The most striking differences were seen in rat lung tumors induced by exposure to X-ray or plutonium where the *ER* gene was methylated in 38 and 82% of tumors, respectively.

A second study examined the prevalence for methylation of a panel of genes in adenocarcinomas from plutonium-exposed workers at MAYAK, the first Russian nuclear enterprise established to manufacture plutonium weapons, compared with non-worker controls (37). The prevalence for methylation of the *MGMT* or *DAP-K* genes did not differ between workers

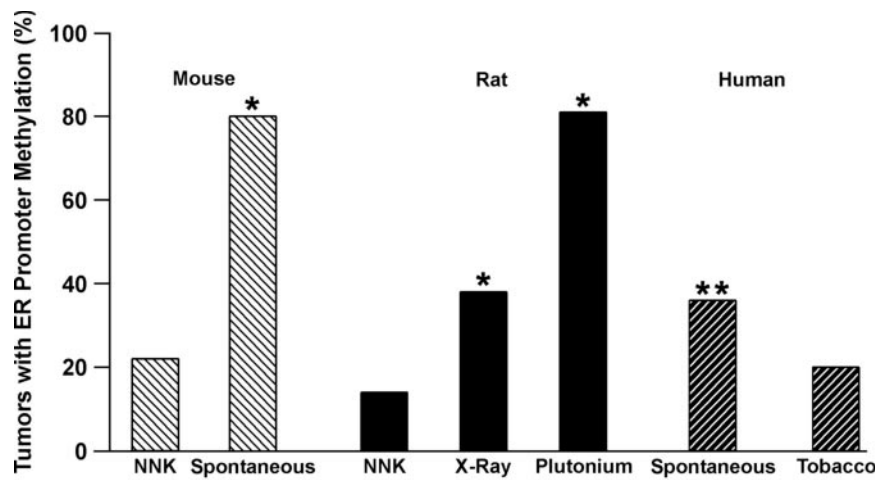

**Fig. 1.** Summary of ER methylation in mouse, rat and human lung tumors. The source of tumors is indicated on the *x* axis. Spontaneous human tumors are from never smokers. \* $P < 0.01$  compared with NNK; \*\* $P < 0.01$  compared with tobacco.

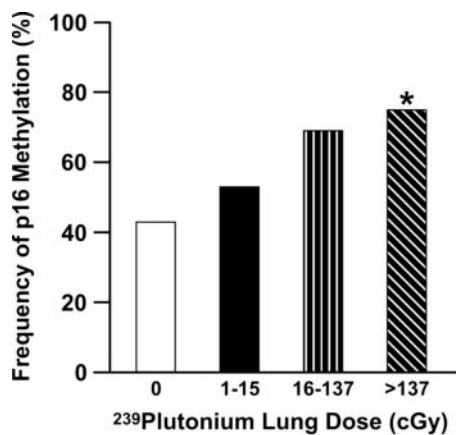

**Fig. 2.** Methylation of the *p16* gene increases as a function of plutonium lung dose in adenocarcinomas from MAYAK workers. \* $P = 0.0008$  for linear trend.

and controls, while a higher prevalence for methylation of the *RASSF1A* gene was seen in tumors from controls. In marked contrast, the prevalence for methylation of *p16* increased significantly in tumors from workers compared with non-worker controls. Stratification of plutonium exposure into tertiles also revealed a striking dose response for methylation of the *p16* gene (Figure 2). Workers in the plutonium plant where exposure to internal radiation was highest had a 3.5 times (CI 1.5, 8.5;  $P = 0.001$ ) greater risk for *p16* methylation in their tumors than controls. This increased probability for methylation approximated the 4-fold increase in relative risk for adenocarcinoma in this group of workers exposed to plutonium. In addition, a trend was seen for an increase in the number of genes methylated (>2 genes) with plutonium dose. Together, these studies show that gene-specific promoter methylation could be modulated differentially depending on carcinogen exposure. Furthermore, the targeting of a gene such as *p16* through a defined environmental exposure may significantly impact the risk for developing adenocarcinoma.

A key question generated from these studies is how these different exposures affect the propensity to inactivate a gene through promoter hypermethylation. With respect to plutonium, the  $\alpha$ -particles generated deposit large amounts of

energy in small volumes along their paths that can lead to double-strand breaks in DNA. A recent study (38) detected and quantified stable intrachromosomal rearrangements within chromosome 5 in the former workers from the MAYAK facility. The yield of these aberrations was highly correlated with plutonium dose to the bone marrow. The extensive DNA damage suggests that radiation exposure to the lung epithelial cells from workers led to the accumulation of massive amounts of chromosomal damage that possibly overwhelmed DNA repair pathways. Extensive DNA damage could in turn disrupt replication timing because of chromosomal instability or loss of normal transcriptional control and both effects have been proposed as mechanisms through which normally unmethylated regions of DNA become aberrantly methylated (39).

Other mechanisms to consider include formation of sites of base loss in DNA (abasic AP sites) and other forms of DNA damage that in addition to causing mutations can alter protein/DNA interactions. AP sites occur frequently as spontaneous events in living cells and become elevated following carcinogen exposure (40). For example, a single AP site within or adjacent to the consensus binding sequences for the transcription factor AP-1 can inhibit transcription factor binding (41). A link between decreased transcription and promoter methylation was suggested by Song *et al.* (42) who evaluated methylation of the glutathione-*S* transferase *P1* gene using stable transfections into prostate cancer cell lines in which the endogenous gene was inactivated through methylation. In those studies, hypermethylation of the transfected gene occurred only after a two-step event that involved 'seeding' methylation in combination with reducing transcription through deletion of an Sp1 site. Thus, disruption of normal transcription by DNA damage could be one factor in initiating promoter methylation.

### Gene promoter methylation in mouse lung

The preceding sections have already demonstrated how methylation studies in animal models have been used to provide insight into elucidating the timing for gene inactivation during tumor development and the effect of defined exposures on methylation prevalence in tumors. Historically, the mouse has been used as a model for evaluating chemopreventive

**Table II.** Gene promoter methylation in murine lung tumors

| Mouse strain | Exposure           | Gene         | Methylation frequency (%) |
|--------------|--------------------|--------------|---------------------------|
| A/J          | NNK                | <i>p16</i>   | 0/15 (0) <sup>a</sup>     |
| AC3F1        | Aflatoxin          | <i>p16</i>   | 51/61 (88) <sup>b</sup>   |
| B6C3F1       | Methylene chloride | <i>p16</i>   | 12/17 (70) <sup>b</sup>   |
| A/J          | NNK                | <i>DAP-K</i> | 13/25 (52) <sup>c</sup>   |
| B6C3F1       | Cigarette smoke    | <i>DAP-K</i> | 9/21 (43) <sup>c</sup>    |
| B6C3F1       | Methylene chloride | <i>DAP-K</i> | 9/18 (50) <sup>c</sup>    |
| C3A          | Vinyl chloride     | <i>DAP-K</i> | 9/15 (60) <sup>c</sup>    |
| A/J          | NNK                | <i>RAR-β</i> | 34/40 (85) <sup>c</sup>   |
| B6C3F1       | Cigarette smoke    | <i>RAR-β</i> | 18/20 (90) <sup>c</sup>   |
| B6C3F1       | Methylene chloride | <i>RAR-β</i> | 10/18 (56) <sup>c,d</sup> |
| C3A          | Vinyl chloride     | <i>RAR-β</i> | 9/15 (60) <sup>c,d</sup>  |

<sup>a</sup>Methylation assessed by Southern blot.

<sup>b</sup>Methylation assessed by bisulfite sequencing.

<sup>c</sup>Methylation assessed by methylation specific PCR.

<sup>d</sup> $P < 0.05$  compared with NNK and cigarette smoke.

agents (43). The identification of carcinogens that induce lung tumors through genetic and epigenetic alterations also seen in human adenocarcinomas would provide improved models to test new chemoprevention strategies. Mutation of the *K-ras* gene is a common alteration in most murine lung tumors induced by different chemical carcinogens and is found in ~35% of human adenocarcinomas (1,33,34). In contrast, mutation of the *p53* gene is rarely seen in mouse lung adenocarcinomas, but occurs in ~40% of human tumors of this histology type (2). The mechanism for inactivation of the *p16* gene in mouse lung differs by carcinogen exposure. Lung tumors induced by NNK in the A/J mice show diminished expression of the *p16* gene consistent with allelic loss, but lack methylation (44). The *p16* gene is deleted in most cell lines derived from NNK-induced tumors (44,45). In contrast, bisulfite sequencing of the *p16* promoter in lung tumors induced by methylene chloride or aflatoxin, shows partial-to-complete methylation of CpG sites in 70–80% of tumors (46,47; Table II). Recently, we have examined methylation of the *DAP-K* and *RAR-β* genes in lung tumors induced in various mouse strains by cigarette smoke, NNK, methylene chloride or vinyl carbamate (18,19). Methylation of *DAP-K* was detected in 40–60% of tumors associated with these exposures (Table II). In contrast, most cigarette smoke- and NNK-induced tumors harbored methylated *RAR-β* alleles, while methylation of this gene was seen in ~50% of methylene chloride and vinyl carbamate tumors. Thus, these mouse lung tumors largely reflect what is observed in human adenocarcinoma with respect to prevalence for inactivation of the *DAP-K* and *RAR-β* genes by promoter hypermethylation (48,49). The utility of this finding may lie in the ability to use these two genes as biomarkers in the evaluation of the effectiveness of agents that affect cytosine methylation and histone deacetylation to cause gene reexpression in lung lesions. The reexpression of genes silenced during premalignancy by promoter hypermethylation has emerged as a new strategy for chemoprevention.

### Effect of modulating promoter methylation on cancer

Gene silencing through hypermethylation is mediated by a series of events that include methylation of cytosines within the gene promoter and the establishment of heterochromatin in

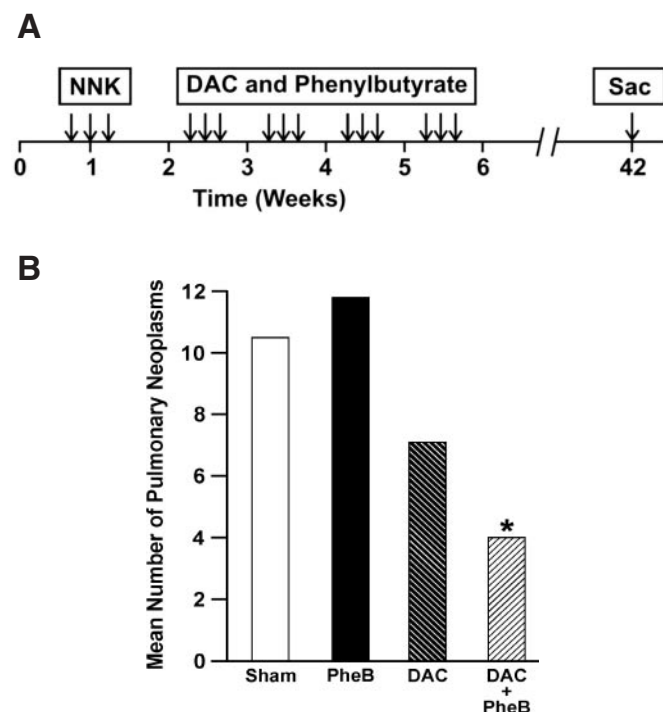

**Fig. 3.** (A) The timing and duration of treatment of mice with NNK, DAC and phenylbutyrate. This line drawing depicts the order and duration for treatment of A/J mice with NNK followed by the preventive agents DAC and phenylbutyrate. (B) Effect of DAC and phenylbutyrate treatment on the mean number of pulmonary neoplasms. The number of pulmonary lesions was decreased significantly ( $*P < 0.05$ ) in mice treated with the combination of DAC + sodium phenylbutyrate.

which the histone tails are modified through effects on acetylation, phosphorylation, methylation and ubiquitylation (16,50). The cytosine DNA-methyltransferase (*DNMT*) genes play a critical role in the establishment of the transcriptionally repressive complex. They function as *de novo* methylases to affect the methylation status of normally unmethylated CpG sites and to recruit histone deacetylases to chromatin (51–55). Treatment of cells with the demethylating agent 5-aza-2'-deoxyazacytidine (DAC) leads to reexpression of genes silenced by promoter methylation (16). DAC inhibits DNA methylation by reducing the DNMT enzymatic activity through the formation of a stable complex between the enzyme and the DAC-substituted DNA (56). One difficulty in using demethylating agents such as DAC *in vivo* is the ability to achieve pharmacologically active doses without systemic toxicity. A more effective approach for modulating aberrant promoter methylation therapeutically was endorsed through a study by Cameron *et al.* (57). These investigators observed that treatment of colorectal tumor cell lines with trichostatin A, an inhibitor of histone deacetylation, did not transcriptionally reactivate genes silenced by promoter hypermethylation. However, when the same cells were exposed to trichostatin A and a low dose of DAC by itself results in minimal gene reexpression, synergistic reexpression was seen with the two-drug combination.

We extended these studies to address *in vivo* if a short-term treatment with low dose DAC combined with the HDAC inhibitor sodium phenylbutyrate can prevent lung tumor development initiated by NNK in the A/J mouse (58). The treatment protocol for these studies is shown in Figure 3A. Short-term

treatment of mice with DAC alone decreased the incidence of neoplasms by 30% (Figure 3B). Importantly, when DAC was combined with sodium phenylbutyrate, lung tumor development was significantly reduced by >50%; no effect was seen with phenylbutyrate alone. These studies demonstrate in a pure prevention model where the treatment occurs after the carcinogen exposure, but before the development of premalignant lesions [seen ~14 weeks after NNK treatment (59)], inhibition of aberrant promoter hypermethylation can block lung cancer development. The next step in validating this approach to cancer control is to determine the efficacy of inhibitors of methylation and histone deacetylation on the progression of premalignant lesions present in the A/J mouse lung. This scenario closely mimics the situation faced with the chronic, lifetime smoker who has developed field cancerization throughout his/her lungs. An additional challenge to this chemopreventive approach will be the necessity in using demethylating agents other than DAC, since this compound is a potential mutagen and carcinogen (60,61). In this regard, other agents and small molecules that target the DNMTs, such as zebularine and hydralazine, could prove an effective alternative for use in cancer prevention (62,63). In addition, L-selenomethionine, a nutrient demonstrated to reduce by half the incidence of expected lung cancer, may act in part through inhibition of DNMTs (64,65). Finally, the tea polyphenol (–)-epigallocatechin-3-gallate inhibits DNMTs and reactivates genes silenced by methylation in cancer cell lines (66). Thus, there is a wealth of alternative compounds that affect DNMTs as well as other inhibitors of histone deacetylation such as valproic acid, which should be tested for efficacy in preventing lung tumor progression in the mouse lung model. Reversing methylation of genes such as *DAP-K* and *RAR-β* in hyperplasias and adenomas within the mouse lung, will be a valuable biomarker for establishing the efficacy of these different preventive approaches. Ultimately, one would envision the management of premalignant lung disease through approaches used today to control asthma. A cocktail of agents, some that modulate methylation and histone deacetylation and others affecting specific pathways, are delivered directly to the lungs of current or former smokers via an inhaler (67). Aberrant promoter hypermethylation clearly plays a prominent role in cancer development, but could also prove to be the key target to reverse or prevent malignant transformation in the aerodigestive tract.

## Acknowledgements

The author would like to thank all his collaborators who participated in the studies acknowledged in this commentary. Work described from the author's laboratory was supported by ES088801, P30-ES-012072, CA70190, P50CA58184 and DE-FC03-98EH98028.

## References

- Rodenhuis, S. (1996) Ras oncogenes and human lung cancer. In Pass, H., Mitchell, J.B., Johnson, D.H. and Turrisi, A.T. (eds) *Lung Cancer Principles and Practice*. Lippincott-Raven, New York, pp. 73–82.
- Greenblatt, M.S., Bennett, W.P., Hollstein, M. and Harris, C.C. (1994) Mutations in the *p53* tumor suppressor gene: clues to cancer etiology and molecular pathogenesis. *Cancer Res.*, **54**, 4855–4878.
- Merlo, A., Gabrielson, E., Askin, F. and Sidransky, D. (1994) Frequent loss of chromosome 9 in human primary non-small cell lung cancer. *Cancer Res.*, **54**, 640–642.
- Kamb, A., Gruis, N.A., Weaver-Feldhaus, J., Liu, Q., Harshman, K., Tavtigian, S.V., Stockert, E., Day, R.S. III, Johnson, B.E. and Skolnick, M.H. (1994) A cell cycle regulator potentially involved in genesis of many tumor types. *Science*, **264**, 436–440.
- Merlo, A., Herman, J.G., Mao, L., Lee, D.J., Gabrielson, E., Burger, P.C., Baylin, S.B. and Sidransky, D. (1995) 5' CpG island methylation is associated with transcriptional silencing of the tumour suppressor *p16/CDKN2/MTS1* in human cancers. *Nat. Med.*, **1**, 633–634.
- Zöchbauer-Müller, S., Fong, K.M., Virmani, A.K., Geradts, J., Gazdar, A.F. and Minna, J.D. (2001) Aberrant promoter methylation of multiple genes in non-small cell lung cancers. *Cancer Res.*, **61**, 249–255.
- Kim, D.-H., Nelson, H.H., Wiencke, J.K., Zheng, S., Christiani, D.C., Waom, J.C., Mark, E.J. and Kelsey, K.T. (2001) *p16<sup>INK4a</sup>* and histology-specific methylation of CpG islands by exposure to tobacco smoke in non-small cell lung cancer. *Cancer Res.*, **61**, 3419–3424.
- Belinsky, S.A., Nikula, K.J., Palmisano, W.A., Michels, R., Saccomanno, G., Gabrielson, E., Baylin, S.B. and Herman, J.G. (1998) Aberrant methylation of *p16<sup>INK4a</sup>* is an early event in lung cancer and a potential biomarker for early diagnosis. *Proc. Natl Acad. Sci. USA*, **95**, 11891–11896.
- Divine, K.K., Pulling, L.C., Marron-Terada, P.G., Kang, T., Schwartz, A.G., Bocklage, T.J., Coons, T.A., Gilliland, F.D. and Belinsky, S.A. (2004) Multiplicity of abnormal promoter methylation in lung adenocarcinomas from smokers and never smokers. *Int. J. Cancer*, doi:10.1002/ijc.20761.
- Lukas, J., Parry, D., Aagaard, L., Mann, D.J., Bartkova, J., Strauss, M., Peters, G. and Bartek, J. (1995) Retinoblastoma-protein-dependent cell-cycle inhibition by the tumor suppressor *p16*. *Nature*, **375**, 503–506.
- Weinberg, R.A. (1995) The retinoblastoma protein and cell cycle control. *Cell*, **81**, 323–330.
- Tsou, J.A., Hagen, J.A., Carpenter, C.L. and Laird-Offringa, I.A. (2002) DNA methylation analysis: a powerful new tool for lung cancer diagnosis. *Oncogene*, **21**, 5450–5461.
- Belinsky, S.A. (2004) Gene promoter hypermethylation as a biomarker in lung cancer. *Nat. Rev. Cancer*, **4**, 707–717.
- Baylin, S.B. and Herman, J.G. (2000) DNA hypermethylation in tumorigenesis: epigenetics joins genetics. *Trends Genet.*, **16**, 168–174.
- Jones, P.A. and Laird, P.W. (1999) Cancer epigenetics comes of age. *Nat. Genet.*, **21**, 163–167.
- Jones, P.A. and Baylin, S.B. (2002) The fundamental role of epigenetic events in cancer. *Nat. Rev. Genet.*, **3**, 415–428.
- Belinsky, S.A., Palmisano, W.A., Gilliland, F.D., Crooks, L.A., Divine, K.K., Winters, S.A., Grimes, M.J., Harms, H.J., Tellez, C.S., Smith, T.M., Moots, P.P., Lechner, J.F., Stidley, C.A. and Crowell, R.E. (2002) Aberrant promoter methylation in bronchial epithelium and sputum from current and former smokers. *Cancer Res.*, **62**, 2370–2377.
- Pulling, L.C., Vuilleminot, B.R., Hutt, J.A., Devereux, T.R. and Belinsky, S.A. (2004) Aberrant promoter hypermethylation of the *death-associated protein kinase* gene is early and frequent in murine lung tumors induced by cigarette smoke and tobacco carcinogens. *Cancer Res.*, **64**, 3844–3848.
- Vuilleminot, B.R., Pulling, L.C., Palmisano, W.A., Hutt, J.A. and Belinsky, S.A. (2004) Carcinogen exposure differentially modulates *RAR-β* promoter hypermethylation, an early and frequent event in mouse lung carcinogenesis. *Carcinogenesis*, **25**, 623–629.
- Pulling, L.C., Divine, K.K., Klinge, D.M., Gilliland, F.D., Kang, T., Schwartz, A.G., Bocklage, T.J., Gilliland, F.D. and Belinsky, S.A. (2003) Promoter hypermethylation of the *O<sup>6</sup>-methylguanine-DNA methyltransferase* gene: more common in lung adenocarcinomas from never-smokers than smokers and associated with tumor progression. *Cancer Res.*, **63**, 4842–4848.
- Wistuba, I.I., Behrens, C., Milchgrub, S., Bryant, D., Hung, J., Minna, J.D. and Gazdar, A.F. (1999) Sequential molecular abnormalities are involved in the multistage development of squamous cell lung carcinoma. *Oncogene*, **18**, 643–650.
- Hirano, T., Franzé, B., Kato, H., Ebihara, Y. and Auer, G. (1994) Genesis of squamous cell lung carcinoma: sequential changes of proliferation, DNA ploidy, and p53 expression. *Am. J. Pathol.*, **144**, 296–302.
- Rhee, C.-S., Sen, M., Lu, D., Wu, C., Leoni, L., Rubin, J., Corr, M. and Carson, D.A. (2002) Wnt and frizzled receptors as potential targets for immunotherapy in head and neck squamous cell carcinomas. *Oncogene*, **21**, 6598–6605.
- Lynch, T.J., Bell, D.W., Sordella, R., Gurubhagavatula, S., Okimoto, R.A., Brannigan, B.W., Harris, P.L., Haserlat, S.M., Supko, J.G., Haluska, F.G., Louis, D.N., Christiani, D.C., Settleman, J. and Haber, D.A. (2004) Activating mutations in the epidermal growth factor receptor underlying responsiveness of non-small-cell lung cancer to gefitinib. *N. Engl. J. Med.*, **350**, 2129–2139.
- Wong, D.J., Foster, S.A., Galloway, D.A. and Reid, B.J. (1999) Progressive region-specific *de novo* methylation of the p16 CpG island in primary

- human mammary epithelial cell strains during escape from M(0) growth arrest. *Mol. Cell. Biol.*, **19**, 5642–5645.
26. Frizelle, S.P., Grim, J., Zhou, J., Gupta, P., Curiel, D.T., Geradts, J. and Kratzke, R.A. (1998) Re-expression of *p16<sup>INK4a</sup>* in mesothelioma cells results in cell cycle arrest, cell death, tumor suppression and tumor regression. *Oncogene*, **16**, 103–110.
  27. Rocco, J.W., Li, D., Liggett, W.H.J., Duan, L., Saunders, J.K.J., Sidransky, D. and O'Malley, B.W.J. (1998) *p16<sup>INK4a</sup>* adenovirus-mediated gene therapy for human head and neck squamous cell cancer. *Clin. Cancer Res.*, **4**, 1697–1704.
  28. Cohen, O., Feinstein, E. and Kimchi, A. (1997) DAP-kinase is a Ca<sup>2+</sup>/calmodulin-dependent, cytoskeletal-associated protein kinase, with cell death-inducing functions that depend on its catalytic activity. *EMBO J.*, **16**, 998–1008.
  29. Cohen, O., Inbal, J., Kissil, J.L., Raveh, T., Berissi, H., Spivak-Kroizaman, T., Feinstein, E. and Kimchi, A. (1999) DAP-kinase participates in TNF- $\alpha$  and Fas-induced apoptosis and its function requires the death domain. *J. Cell Biol.*, **146**, 141–148.
  30. Raveh, T., Droguett, G., Horwitz, M.S., DePinho, R.A. and Kimchi, A. (2001) DAP kinase activates a p19<sup>ARF</sup>/p53-mediated apoptotic checkpoint to suppress oncogenic transformation. *Nat. Cell Biol.*, **3**, 1–7.
  31. Treutin, P.M., Chen, L.I., Buetow, B.S., Zeng, W., Birkebak, T.A., Seewaldt, V.L., Sommer, K.M., Emond, M., Moggio-Price, L. and Swisshelm, K. (2002) Retinoic acid receptor beta2 inhibition of metastasis in mouse mammary gland xenografts. *Breast Cancer Res. Treat.*, **72**, 79–88.
  32. Raffo, P., Emionite, L., Colucci, L., Belmondo, F., Moro, M.G., Bolag, W. and Tom, S. (2000) Retinoid receptors: pathways of proliferation inhibition and apoptosis in breast cancer cell lines. *Anticancer Res.*, **20**, 1535–1543.
  33. You, M., Want, Y., Lineen, A., Stoner, G.D., You, L.A., Maronpot, R.R. and Anderson, M.W. (1991) Activation of protooncogenes in mouse lung tumors. *Exp. Lung Res.*, **17**, 389–400.
  34. Belinsky, S.A., Devereux, T.R., Maronpot, R.R., Stoner, G.D. and Anderson, M.W. (1989) The relationship between the formation of promutagenic adducts and the activation of the *K-ras* protooncogene in lung tumors from A/J mice treated with nitrosamines. *Cancer Res.*, **49**, 5305–5311.
  35. Denissenko, M.F., Pao, A., Tang, M. and Pfeifer, G.P. (1996) Preferential formation of benzo[a]pyrene adducts at lung cancer mutational hotspots in *p53*. *Science*, **274**, 430–432.
  36. Issa, J.J., Baylin, S.B. and Belinsky, S.A. (1996) Methylation of the estrogen receptor CpG island in lung tumors is related to the specific type of carcinogen exposure. *Cancer Res.*, **56**, 3655–3658.
  37. Belinsky, S.A., Klinge, D.M., Liechty, K.C., March, T.H., Kang, T., Gilliland, F.D., Sotnic, N., Adamova, G., Rusinova, G. and Telnov, V. (2004) Plutonium targets the *p16* gene for inactivation by promoter hypermethylation in human lung adenocarcinoma. *Carcinogenesis*, **25**, 1063–1067.
  38. Hande, M.P., Azizova, T.V., Geard, C.R., Burak, L.E., Mitchell, C.R., Khokhryakov, V.F., Vasilenko, E.K. and Brenner, D.J. (2003) Past exposure to densely ionizing radiation leaves a unique permanent signature in the genome. *Am. J. Hum. Genet.*, **72**, 1162–1170.
  39. Rountree, M.R., Bachman, K.E., Herman, J.G. and Baylin, S.B. (2001) DNA methylation, chromatin inheritance and cancer. *Oncogene*, **20**, 3156–3165.
  40. Demple, B., Harrison, L., Wilson, D.M., Bennett, R.A.O., Takagi, T. and Ascione, A.G. (1997) Regulation of eukaryotic abasic endonucleases and their role in genetic stability. *Environ. Health Perspect.*, **105**, 931–936.
  41. Parsian, A.J., Funk, M.C., Tao, T.Y. and Hunt, C.R. (2002) The effect of DNA damage on the formation of protein/DNA complexes. *Mutat. Res.*, **501**, 105–113.
  42. Song, J.Z., Stirzaker, C., Harrison, J., Melki, J.R. and Clark, S.J. (2002) Hypermethylation trigger of the glutathione-S-transferase gene (GSTP1) in prostate cancer cells. *Oncogene*, **21**, 1048–1061.
  43. Malkinson, A.M. (2001) Primary lung tumors in mice as an aid for understanding, preventing, and treating human adenocarcinoma of the lung. *Lung Cancer*, **32**, 265–279.
  44. Belinsky, S.A., Swafford, D.S., Middleton, S.K., Kennedy, C.H. and Tesfaigzi, J. (1997) Deletion and differential expression of *p16<sup>INK4a</sup>* in mouse lung tumors. *Carcinogenesis*, **18**, 115–120.
  45. Herzog, C.R., Soloff, E.V., McDoniels, A.L., Tyson, F.L., Malkinson, A.M., Haugen-Strano, A., Wiseman, R.W., Anderson, M.W. and You, M. (1996) Homozygous codeletion and differential decreased expression of *p15<sup>INK4b</sup>*, *p16<sup>INK4a</sup>*- $\alpha$  and *p16<sup>INK4a</sup>*- $\beta$  in mouse lung tumor cells. *Oncogene*, **13**, 1885–1891.
  46. Patel, A.C., Anna, C.H., Foley, J.F., Stockton, P.S., Tyson, F.L., Barrett, J.C. and Devereux, T.R. (2000) Hypermethylation of the *p16<sup>INK4a</sup>* promoter in B6C3F1 mouse primary lung adenocarcinomas and mouse lung cell lines. *Carcinogenesis*, **21**, 1691–1700.
  47. Tam, A.S., Devereux, T.R., Patel, A.C., Foley, J.F., Maronpot, R.R. and Massey, T.E. (2003) Perturbations of the *Ink4a/Arf* gene locus in aflatoxin B<sub>1</sub>-induced mouse lung tumors. *Carcinogenesis*, **24**, 121–132.
  48. Tang, X., Fadlo, R., Khuri, J., Lee, J., Kemp, B.L., Liu, D., Hong, W.K. and Mao, L. (2000) Hypermethylation of the death-associated protein (DAP) kinase promoter and aggressiveness in stage I non-small cell lung cancer. *J. Natl Cancer Inst.*, **92**, 1511–1516.
  49. Virmani, A.K., Rathi, A., Zöchbauer-Müller, S., Sacchi, N., Fukuyama, Y., Bryant, D., Maitra, A., Heda, S., Fong, K.M., Thunnissen, F., Minna, J.D. and Gazdar, A.F. (2000) Promoter methylation and silencing of the *retinoic acid receptor- $\beta$*  gene in lung carcinomas. *J. Natl Cancer Inst.*, **92**, 1303–1307.
  50. Kelly, W.K., O'Connor, O.A. and Marks, P.A. (2002) Histone deacetylase inhibitors: from target to clinical trials. *Expert Opin. Investig. Drugs*, **11**, 1695–1713.
  51. Szyf, M., Kaplan, F., Mann, V., Giloh, H., Kedar, E. and Razin, A. (1985) Cell cycle-dependent regulation of eukaryotic DNA methylase level. *J. Biol. Chem.*, **260**, 8653–8656.
  52. Robertson, K.D., Uzvolgyi, E., Liang, G., Talmadge, C., Sumegi, J., Gonzales, F.A. and Jones, P.A. (1999) The human DNA methyltransferases (DNMTs) 1, 3a and 3b: coordinate mRNA expression in normal tissues and overexpression in tumors. *Nucleic Acids Res.*, **27**, 2291–2298.
  53. Okano, M., Bell, D.W., Haber, D.A. and Li, E. (1999) DNA methyltransferases Dnmt3a and Dnmt3b are essential for *de novo* methylation and mammalian development. *Cell*, **99**, 247–257.
  54. Roundtree, M.R., Bachman, K.E. and Baylin, S.B. (2000) DNMT1 binds HDAC2 and a new co-repressor, DMAP1, to form a complex at replication foci. *Nat. Genet.*, **25**, 269–277.
  55. Fuks, F., Burgers, W.A., Brehm, A., Hughes-Davies, L. and Kouzarides, T. (2000) DNA methyltransferase Dnmt1 associates with histone deacetylase activity. *Nat. Genet.*, **24**, 88–91.
  56. Santi, D.V., Garrett, C.E. and Barr, P.J. (1983) On the mechanism of inhibition of DNA-cytosine methyltransferase by cytidine analogs. *Cell*, **83**, 9–10.
  57. Cameron, E.E., Bachman, K.E., Myohanen, S., Herman, J.G. and Baylin, S.B. (1999) Synergy of demethylation and histone deacetylase inhibition in the re-expression of genes silenced in cancer. *Nat. Genet.*, **21**, 103–107.
  58. Belinsky, S.A., Klinge, D.M., Stidley, C.A., Issa, J.-P., Herman, J.G., March, T.H. and Baylin, S.B. (2003) Inhibition of DNA methylation and histone deacetylation prevents murine lung cancer. *Cancer Res.*, **63**, 7089–7093.
  59. Belinsky, S.A., Devereux, T.R., Foley, J.F., Maronpot, R.R. and Anderson, M.W. (1992) The role of the alveolar type II cell in the development and progression of pulmonary tumors induced by 4-(methylnitrosamino)-1-(3-pyridyl)-1-butanone in the A/J mouse. *Cancer Res.*, **52**, 3164–3173.
  60. Carr, B.I., Reilly, J.G., Smith, S.S., Winberg, C. and Riggs, A. (1984) The tumorigenicity of 5-azacytidine in the male Fischer rat. *Carcinogenesis*, **12**, 1583–1590.
  61. Cunha, K.S., Reguly, M.L., Graf, U. and de Andrade, H.H. (2002) Somatic recombination: a major genotoxic effect of two pyrimidine antimetabolite chemotherapeutic drugs in *Drosophila melanogaster*. *Mutat. Res.*, **514**, 95–103.
  62. Cheng, J.C., Weisenberger, D.J., Gonzales, F.A., Liang, G., Xu, G.-L., Hu, Y.-G., Marquez, V.E. and Jones, P.A. (2004) Continuous zebularine treatment effectively sustains demethylation in human bladder cancer cells. *Mol. Cell. Biol.*, **24**, 1270–1278.
  63. Segura-Pacheco, B., Trejo-Becerrill, C., Perez-Cardenas, E., Taja-Chayeb, L., Mariscal, L., Staretz, A., Acuña, C., Salazar, A.M., Lizano, M. and Dueñas-Gonzalez, A. (2003) Reactivation of tumor suppressor genes by the cardiovascular drugs hydralazine and procainamide and their potential use in cancer therapy. *Clin. Cancer Res.*, **9**, 1596–1603.
  64. Reid, M.E., Duffield-Lillico, A.J., Garland, L., Turnbull, B.W., Clark, L.C. and Marshall, J.R. (2002) Selenium supplementation and lung cancer incidence: an update of the nutritional prevention of cancer trial. *Cancer Epidemiol. Biomarkers Prev.*, **11**, 1285–1291.
  65. Fiala, E.S., Staretz, M.D., Pandya, G.A., El-Bayoumy, K. and Hamilton, S.R. (1998) Inhibition of DNA cytosine methyltransferase by chemopreventive selenium compounds determined by an improved assay for cytosine methyltransferase and DNA cytosine methylation. *Carcinogenesis*, **19**, 597–604.
  66. Fang, M.Z., Wang, Y., Ai, N., Hou, Z., Sun, Y., Lu, H., Welsh, W. and Yang, C.S. (2003) Tea polyphenol (–)-epigallocatechin-3-gallate inhibits DNA methyltransferase and reactivates methylation-silenced genes in cancer cell lines. *Cancer Res.*, **63**, 7563–7570.

67. Spinella, M.J. and Dmitrovsky, E. (2000) Aerosolized delivery and lung cancer prevention: pre-clinical models show promise. *Clin. Cancer Res.*, **6**, 2963–2964.

*Conflict of Interest Statement*

The author is a consultant to Oncomethylome. Under a licensing agreement between Lovelace Respiratory Research Institute and Oncomethylome,

nested methylation-specific PCR was licensed to Oncomethylome, and the author is entitled to a share of the royalties received by the institute from sales of the licensed technology. The institute, in accordance with its conflict-of-interest policies, is managing the terms of these arrangements.

*Received September 13, 2004; revised January 3, 2005; accepted January 8, 2005*
